# Supplementary material for: Visible-light-induced photo-Fenton process for the facile degradation of metronidazole by Fe/Si codoped TiO2
Source: Royal Society of Chemistry journal article supplement (doi:10.1039/c8ra08114j), 2018-01-01
Supplement: c8ra08114j1.pdf [file c8ra08114j1.pdf]

**Supporting information**

**Visible-light-induced Photo-Fenton process for the facile  
degradation of metronidazole by Fe/Si codoped TiO<sub>2</sub>**

*Wei Du<sup>a</sup>, Qin Xu<sup>a\*</sup>, Dangqin Jin<sup>c</sup>, Xiaoyu Wang<sup>a</sup>, Yun Shu<sup>a</sup>, Liming Kong<sup>\*</sup>, Xiaoya*

*Hu<sup>a,b</sup>*

<sup>a</sup>School of Chemistry and Chemical Engineering, Yangzhou University, Yangzhou  
225002, China;

<sup>b</sup>Guangling College, Yangzhou University, Yangzhou 225002, China;

<sup>c</sup>Department of Chemical Engineering, Yangzhou Polytechnic Institute, Yangzhou  
225127, China.

Tel: +86 514 87975244; Fax: +86 514 87975244;

E-mail: [xuqin@yzu.edu.cn](mailto:xuqin@yzu.edu.cn); [limingkong@yzu.edu.cn](mailto:limingkong@yzu.edu.cn)

**Table S1 Application of doped/modified TiO<sub>2</sub> for photo-fenton reactions**

| Catalysts<br>/amount                                                                                | Pollutants/<br>initial amount                     | pH   | light<br>source  | Degration<br>time | Degradation<br>efficiency<br>% | ref          |
|-----------------------------------------------------------------------------------------------------|---------------------------------------------------|------|------------------|-------------------|--------------------------------|--------------|
| Fe-N-Ag-TiO <sub>2</sub> /<br>250 mg/L                                                              | Cephalexin<br>50 mg/L                             | 3.5  | Sunlight         | 150               | 90                             | 1            |
| mp-MXene/<br>TiO <sub>2-x</sub> <sup>a</sup> NDs<br>13.3 mg/L                                       | Rhodamine B<br>30 mg/L                            | 5.78 | 500 W<br>Xe lamp | 10                | 96                             | 2            |
| Fe-TiO <sub>2</sub><br>1 mg/L                                                                       | Reactive<br>Brilliant Red<br>X3B<br>0.16 mM       | 3.0  | 300 W<br>Xe lamp | 20                | 96                             | 3            |
| Diatomite<br>(Kieselguhr)-<br>Fe <sub>2</sub> O <sub>3</sub> -TiO <sub>2</sub><br>2000 mg/L         | methylene<br>blue<br>2.9*10 <sup>-5</sup><br>mg/L | 7.0  | 300 W<br>Xe lamp | 120               | 96                             | 4            |
| TiO <sub>2</sub> /Fe <sub>2</sub> TiO <sub>5</sub> /<br>Fe <sub>2</sub> O <sub>3</sub><br>1000 mg/L | Phenol<br>10 mg/L                                 | 4.0  | 300 W<br>Xe lamp | 60                | Almost<br>100                  | 5            |
| SiO <sub>2</sub> /Fe <sub>3</sub> O <sub>4</sub> /<br>C@TiO <sub>2</sub><br>250 mg/L                | p-nitrophenol<br>8 g/L                            | 3.0  | 500W<br>UV lamp  | 240               | 90                             | 6            |
| Fe <sub>3</sub> O <sub>4</sub> @void<br>@TiO <sub>2</sub><br>250 mg/L                               | Tetracycline<br>40 mg/L                           | 7.0  | 300 W<br>Xe lamp | 10                | 95                             | 7            |
| Fe/Si codoped<br>TiO <sub>2</sub><br>1000 mg/L                                                      | MNZ<br>10 mg/L                                    | 7.0  | 220W<br>Xe lamp  | 50                | 93                             | This<br>work |

<sup>a</sup> microporous MXene monolayers embedded with Ti<sup>3+</sup>-doped TiO<sub>2</sub> nanodots

The experimental design (or design of experiments) in optimization of MNZ degradation efficiency is also a vital part of the experiment. It has been reported that while analyzing the effects of multiple process parameters on one or more responses the use of conventional methods like one variable at a time (OVAT) could not be applied, as these were time consuming and labor intensive. Therefore, the use of suitable statistical approach which could reduce the number of experiments and offer reasonably reliable results were proposed in such situations. In this study, a statistical multivariate approach using BBD (Box-Behnken Design) in combination with RSM (Response Surface Methodology) was adopted to find the optimization condition <sup>8</sup>. All the statistical analyses and plots were made using the Design-Expert software (version 8.0.7.1)

The relationship between the response (Y) and process parameters (X<sub>i</sub>) as represented by the response function as given in **equation (1)**

$$Y = b_0 + b_1X_1 + b_2X_2 + b_3X_3 + b_4X_4 + b_5X_5 + b_6X_6 + b_{11}X_1^2 + b_{12}X_1X_2 + b_{13}X_1X_3 + b_{14}X_1X_4 + b_{15}X_1X_5 + b_{16}X_1X_6 + b_{22}X_2^2 + b_{23}X_2X_3 + b_{24}X_2X_4 + b_{25}X_2X_5 + b_{26}X_2X_6 + b_{33}X_3^2 + b_{34}X_3X_4 + b_{35}X_3X_5 + b_{36}X_3X_6 + b_{44}X_4^2 + b_{45}X_4X_5 + b_{46}X_4X_6 + b_{55}X_5^2 + b_{56}X_5X_6 + b_{66}X_6^2 \quad \text{Eq. (1)}$$

Where: b<sub>i</sub> depicts the response function coefficients for process parameters. The coded values for low, middle and high levels of the process parameters (concentration of MNZ, ppm, dosage of H<sub>2</sub>O<sub>2</sub>, mL, initial pH, dosage of Fe/Si codoped TiO<sub>2</sub>, g, degradation time, min, the ratio of Fe and Si) are shown in **Table S2**.

**Table S2** Coded representation of process parameters for statistical analysis.

| No. | Process Parameters                      | Units | Coded Valves            |          |            |           |
|-----|-----------------------------------------|-------|-------------------------|----------|------------|-----------|
|     |                                         |       | Symbolic representation | -1 (Low) | 0 (Middle) | +1 (High) |
| 1   | MNZ                                     | ppm   | X <sub>1</sub>          | 1        | 5.5        | 10        |
| 2   | H <sub>2</sub> O <sub>2</sub>           | mL    | X <sub>2</sub>          | 0.1      | 0.4        | 0.7       |
| 3   | pH                                      | ~     | X <sub>3</sub>          | 2        | 4.5        | 7         |
| 4   | amount of Fe/Si codopedTiO <sub>2</sub> | g     | X <sub>4</sub>          | 0.05     | 0.17       | 0.3       |
| 5   | time                                    | min   | X <sub>5</sub>          | 20       | 45         | 70        |
| 6   | Fe:Si                                   | ~     | X <sub>6</sub>          | 1        | 3.5        | 6         |

Adequacy of the designed models was assessed using “goodness of fit” and analysis of variance (ANOVA) technique. RSM was used to generate 3D surface plots from the validated models. These surface plots were used to locate the optimum points of process parameters to attain maximum degradation of MNZ.

The response functions generated for Y, % MNZ degradation using the equation (1) was presented in **equation (2)**

$$Y = -53.15 - 6.87X_1 - 31.71X_2 + 35.03X_3 - 78.44X_4 + 0.74X_5 + 1.36X_6 + 4.39X_1X_2 - 0.58X_1X_3 + 13.20X_1X_4 - 0.03X_1X_5 + 0.20X_1X_6 - 1.39X_2X_3 + 34.83X_3X_4 + 0.05X_2X_5 - 1.78X_2X_6 + 22.39X_3X_4 - 0.14X_3X_5 + 1.50X_3X_6 + 0.36X_4X_5 + 10.04X_4X_6 + 0.08X_5X_6 + 0.38X_1^2 + 16.27X_2^2 - 2.90X_3^2 - 116.58X_4^2 - 1.11X_5^2 - 1.18X_6^2$$

**Eq. (2)**

All the terms are included in the equations irrespective of their statistical significance. The experimental responses (results of 54 BBD experimental set) is shown in **Table S3**

**Table S3** Experimental responses with different variables

| No. | variables              |                                                 |                 |                                                 |                         |                    | experimental responses |
|-----|------------------------|-------------------------------------------------|-----------------|-------------------------------------------------|-------------------------|--------------------|------------------------|
|     | MNZ coded valves (ppm) | H <sub>2</sub> O <sub>2</sub> coded valves (mL) | pH coded valves | Fe/Si codoped TiO <sub>2</sub> coded valves (g) | time coded valves (min) | Fe:Si coded valves | Y (%)                  |
| 1   | 0                      | +1                                              | +1              | 0                                               | +1                      | 0                  | 43.38                  |
|     | 5.5                    | 0.7                                             | 7.0             | 0.17                                            | 70                      | 3.5                |                        |
| 2   | 0                      | 0                                               | -1              | +1                                              | 0                       | -1                 | 10.21                  |
|     | 5.5                    | 0.4                                             | 2.0             | 0.30                                            | 45                      | 1                  |                        |
| 3   | 0                      | -1                                              | +1              | 0                                               | +1                      | 0                  | 41.23                  |
|     | 5.5                    | 0.1                                             | 7.0             | 0.17                                            | 70                      | 3.5                |                        |
| 4   | 1                      | 0                                               | -1              | 0                                               | 0                       | -1                 | 10.23                  |
|     | 10                     | 0.4                                             | 2.0             | 0.17                                            | 45                      | 1                  |                        |
| 5   | 0                      | 0                                               | 0               | 0                                               | 0                       | 0                  | 65.51                  |
|     | 5.5                    | 0.4                                             | 4.5             | 0.17                                            | 45                      | 3.5                |                        |
| 6   | 0                      | 0                                               | 0               | 0                                               | 0                       | 0                  | 68.67                  |
|     | 5.5                    | 0.4                                             | 4.5             | 0.17                                            | 45                      | 3.5                |                        |
| 7   | 0                      | +1                                              | 0               | 0                                               | +1                      | -1                 | 43.97                  |
|     | 5.5                    | 0.7                                             | 4.5             | 0.17                                            | 70                      | 1                  |                        |
| 8   | -1                     | 0                                               | 0               | +1                                              | -1                      | 0                  | 77.67                  |
|     | 1                      | 0.4                                             | 4.5             | 0.30                                            | 20                      | 3.5                |                        |
| 9   | 0                      | -1                                              | -1              | 0                                               | -1                      | 0                  | 10.32                  |
|     | 5.5                    | 0.1                                             | 2.0             | 0.17                                            | 20                      | 3.5                |                        |
| 10  | -1                     | 0                                               | 0               | -1                                              | -1                      | 0                  | 30.1                   |
|     | 1                      | 0.4                                             | 4.5             | 0.05                                            | 20                      | 3.5                |                        |
| 11  | 0                      | +1                                              | -1              | 0                                               | -1                      | 0                  | 10.25                  |
|     | 5.5                    | 0.7                                             | 2.0             | 0.17                                            | 20                      | 3.5                |                        |
| 12  | -1                     | -1                                              | 0               | -1                                              | 0                       | 0                  | 72.41                  |
|     | 1                      | 0.1                                             | 4.5             | 0.05                                            | 45                      | 3.5                |                        |
| 13  | -1                     | 0                                               | 0               | +1                                              | +1                      | 0                  | 85.44                  |
|     | 1                      | 0.4                                             | 4.5             | 0.30                                            | 70                      | 3.5                |                        |
| 14  | 1                      | +1                                              | 0               | -1                                              | 0                       | 0                  | 27.32                  |
|     | 10                     | 0.7                                             | 4.5             | 0.05                                            | 45                      | 3.5                |                        |
| 15  | -1                     | 0                                               | +1              | 0                                               | 0                       | +1                 | 84.93                  |
|     | 1                      | 0.4                                             | 7.0             | 0.17                                            | 45                      | 6                  |                        |
| 16  | 0                      | -1                                              | +1              | 0                                               | -1                      | 0                  | 81.85                  |
|     | 5.5                    | 0.1                                             | 7.0             | 0.17                                            | 20                      | 3.5                |                        |
| 17  | 0                      | 0                                               | -1              | -1                                              | 0                       | -1                 | 10.18                  |
|     | 5.5                    | 0.4                                             | 2.0             | 0.05                                            | 45                      | 1                  |                        |

---

|    |     |     |     |      |    |     |       |
|----|-----|-----|-----|------|----|-----|-------|
| 18 | 1   | -1  | 0   | -1   | 0  | 0   | 14.02 |
|    | 10  | 0.1 | 4.5 | 0.05 | 45 | 3.5 |       |
| 19 | 1   | 0   | 0   | 0    | 0  | -1  | 23.2  |
|    | 10  | 0.4 | 4.5 | 0.17 | 45 | 1   |       |
| 20 | 0   | 0   | +1  | +1   | 0  | +1  | 79.43 |
|    | 5.5 | 0.4 | 7.0 | 0.30 | 45 | 6   |       |
| 21 | 1   | 0   | 0   | 0    | 0  | +1  | 67.81 |
|    | 10  | 0.4 | 4.5 | 0.17 | 45 | 6   |       |
| 22 | 0   | -1  | 0   | 0    | -1 | +1  | 38.49 |
|    | 5.5 | 0.1 | 4.5 | 0.17 | 20 | 6   |       |
| 23 | -1  | 0   | 0   | -1   | +1 | 0   | 66.02 |
|    | 1   | 0.4 | 4.5 | 0.05 | 70 | 3.5 |       |
| 24 | 0   | 0   | +1  | +1   | 0  | -1  | 27.53 |
|    | 5.5 | 0.4 | 7.0 | 0.30 | 45 | 1   |       |
| 25 | 0   | -1  | -1  | 0    | +1 | 0   | 10.25 |
|    | 5.5 | 0.1 | 2.0 | 0.17 | 70 | 3.5 |       |
| 26 | -1  | +1  | 0   | -1   | 0  | 0   | 56.31 |
|    | 1   | 0.7 | 4.5 | 0.05 | 45 | 3.5 |       |
| 27 | 1   | +1  | 0   | +1   | 0  | 0   | 82.43 |
|    | 10  | 0.7 | 4.5 | 0.30 | 45 | 3.5 |       |
| 28 | 0   | 0   | -1  | +1   | 0  | +1  | 10.21 |
|    | 5.5 | 0.4 | 2.0 | 0.30 | 45 | 6   |       |
| 29 | -1  | -1  | 0   | +1   | 0  | 0   | 79.31 |
|    | 1   | 0.1 | 4.5 | 0.30 | 45 | 3.5 |       |
| 30 | 0   | 0   | 0   | 0    | 0  | 0   | 55.02 |
|    | 5.5 | 0.4 | 4.5 | 0.17 | 45 | 3.5 |       |
| 31 | 1   | 0   | -1  | 0    | 0  | +1  | 20    |
|    | 10  | 0.4 | 2.0 | 0.17 | 45 | 6   |       |
| 32 | 0   | 0   | 0   | 0    | 0  | 0   | 10.22 |
|    | 5.5 | 0.4 | 4.5 | 0.17 | 45 | 3.5 |       |
| 33 | 0   | 0   | +1  | -1   | 0  | -1  | 12.09 |
|    | 5.5 | 0.4 | 7.0 | 0.05 | 45 | 1   |       |
| 34 | 1   | 0   | 0   | -1   | +1 | 0   | 20.73 |
|    | 10  | 0.4 | 4.5 | 0.05 | 70 | 3.5 |       |
| 35 | -1  | +1  | 0   | +1   | 0  | 0   | 74.13 |
|    | 1   | 0.7 | 4.5 | 0.30 | 45 | 3.5 |       |
| 36 | -1  | 0   | -1  | 0    | 0  | -1  | 10.23 |
|    | 1   | 0.4 | 2.0 | 0.17 | 45 | 1   |       |
| 37 | 1   | 0   | 0   | -1   | -1 | 0   | 28.86 |
|    | 10  | 0.4 | 4.5 | 0.05 | 20 | 3.5 |       |
| 38 | 0   | 0   | 0   | 0    | 0  | 0   | 54.86 |
|    | 5.5 | 0.4 | 4.5 | 0.17 | 45 | 3.5 |       |
| 39 | 0   | -1  | 0   | 0    | +1 | -1  | 35.31 |
|    | 5.5 | 0.1 | 4.5 | 0.17 | 70 | 1   |       |

---

|    |     |     |     |      |    |     |       |
|----|-----|-----|-----|------|----|-----|-------|
| 40 | 0   | 0   | 0   | 0    | 0  | 0   | 58.62 |
|    | 5.5 | 0.4 | 4.5 | 0.17 | 45 | 3.5 |       |
| 41 | 1   | 0   | 0   | +1   | -1 | 0   | 60.2  |
|    | 10  | 0.4 | 4.5 | 0.30 | 20 | 3.5 |       |
| 42 | 0   | -1  | 0   | 0    | -1 | -1  | 10.41 |
|    | 5.5 | 0.1 | 4.5 | 0.17 | 20 | 1   |       |
| 43 | 0   | +1  | -1  | 0    | +1 | 0   | 10.19 |
|    | 5.5 | 0.7 | 2.0 | 0.17 | 70 | 3.5 |       |
| 44 | 0   | -1  | 0   | 0    | +1 | +1  | 94.56 |
|    | 5.5 | 0.1 | 4.5 | 0.17 | 70 | 6   |       |
| 45 | 1   | 0   | 0   | +1   | +1 | 0   | 89.22 |
|    | 10  | 0.4 | 4.5 | 0.30 | 70 | 3.5 |       |
| 46 | 0   | +1  | +1  | 0    | -1 | 0   | 71.38 |
|    | 5.5 | 0.7 | 7.0 | 0.17 | 20 | 3.5 |       |
| 47 | 0   | +1  | 0   | 0    | +1 | +1  | 85.99 |
|    | 5.5 | 0.7 | 4.5 | 0.17 | 70 | 6   |       |
| 48 | 0   | +1  | 0   | 0    | -1 | -1  | 14.25 |
|    | 5.5 | 0.7 | 4.5 | 0.17 | 20 | 1   |       |
| 49 | 0   | 0   | 0   | -1   | 0  | +1  | 38.89 |
|    | 5.5 | 0.4 | 4.5 | 0.05 | 45 | 6   |       |
| 50 | 1   | -1  | 0   | +1   | 0  | 0   | 69.6  |
|    | 10  | 0.1 | 4.5 | 0.30 | 45 | 3.5 |       |
| 51 | 0   | +1  | 0   | 0    | -1 | +1  | 44.89 |
|    | 5.5 | 0.7 | 4.5 | 0.17 | 20 | 6   |       |
| 52 | 0   | 0   | -1  | -1   | 0  | +1  | 10.25 |
|    | 5.5 | 0.4 | 2.0 | 0.05 | 45 | 6   |       |
| 53 | -1  | 0   | +1  | 0    | 0  | -1  | 48.05 |
|    | 1   | 0.4 | 7.0 | 0.17 | 45 | 1   |       |
| 54 | -1  | 0   | -1  | 0    | 0  | +1  | 10.23 |
|    | 1   | 0.4 | 2.0 | 0.17 | 45 | 6   |       |

Using Design-Expert software, 3-dimensional surface plots with contour plots were generated to find the optimal conditions of the process parameters. These plots are shown in **Fig. S1 (a)-(o)**:

From the surface plots, the maximum degradation levels of MNZ at optimum conditions of process parameters were obtained. The maximum degradation of MNZ is observed to be 94.56%.

90.56  
 10.18  
 X1 = A: MNZ  
 X2 = B: H2O2  
 Actual Factors  
 C: pH = 7.00  
 D: Fe-Si-TiO2 = 0.30  
 E: Time = 45.00  
 F: Fe:Si = 6.00

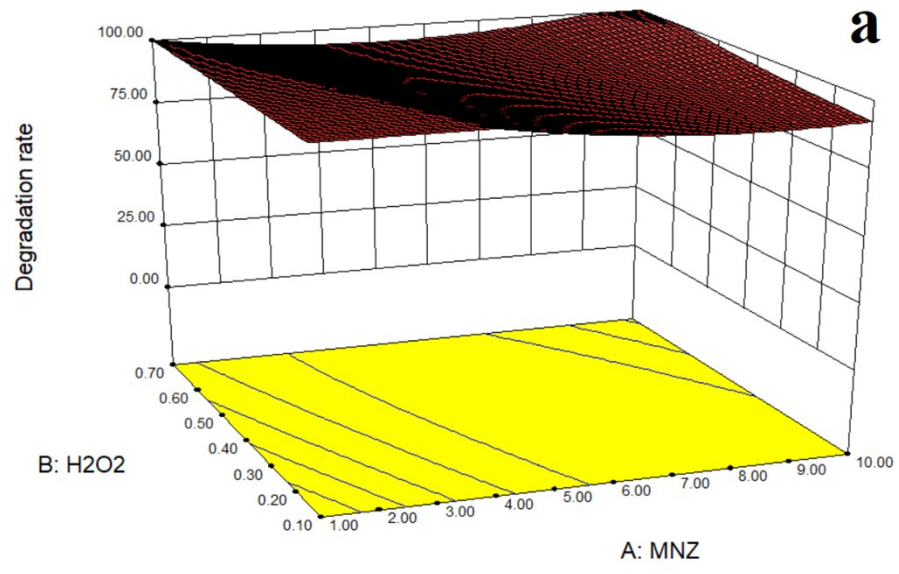

90.56  
 10.18  
 X1 = A: MNZ  
 X2 = C: pH  
 Actual Factors  
 B: H2O2 = 0.40  
 D: Fe-Si-TiO2 = 0.30  
 E: Time = 45.00  
 F: Fe:Si = 6.00

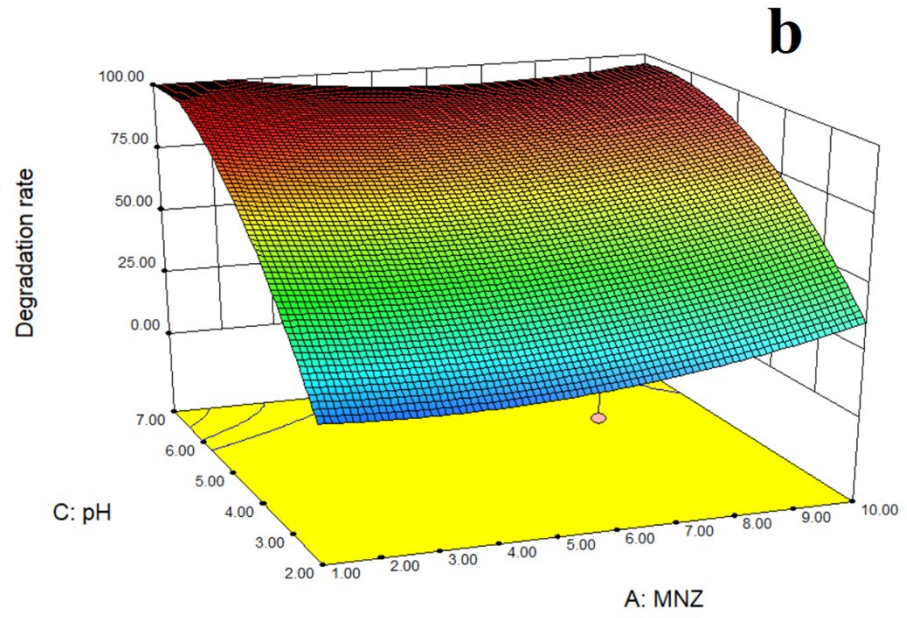



90.56  
 10.18  
 X1 = A: MNZ  
 X2 = D: Fe-Si-TiO<sub>2</sub>  
 Actual Factors  
 B: H<sub>2</sub>O<sub>2</sub> = 0.40  
 C: pH = 7.00  
 E: Time = 45.00  
 F: Fe:Si = 6.00

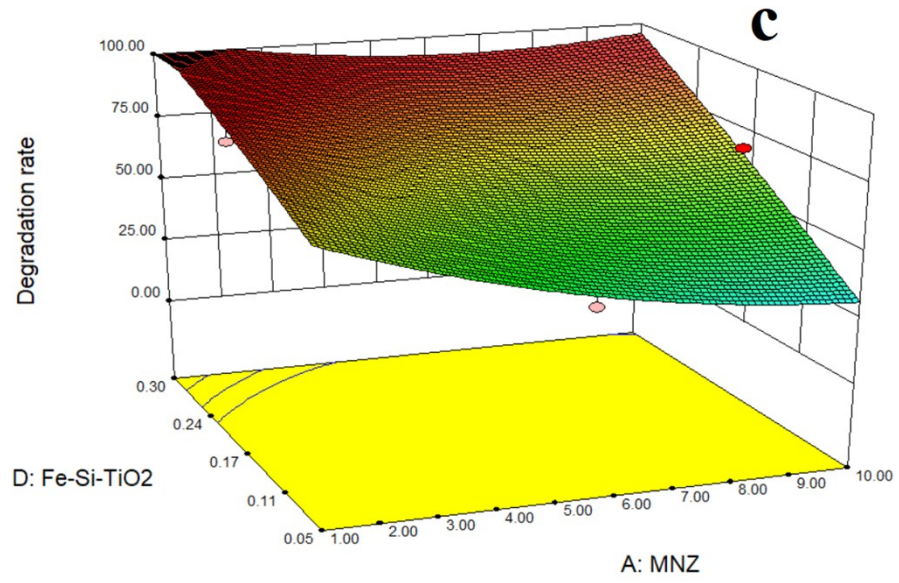

90.56  
 10.18  
 X1 = A: MNZ  
 X2 = E: Time  
 Actual Factors  
 B: H<sub>2</sub>O<sub>2</sub> = 0.40  
 C: pH = 7.00  
 D: Fe-Si-TiO<sub>2</sub> = 0.30  
 F: Fe:Si = 6.00

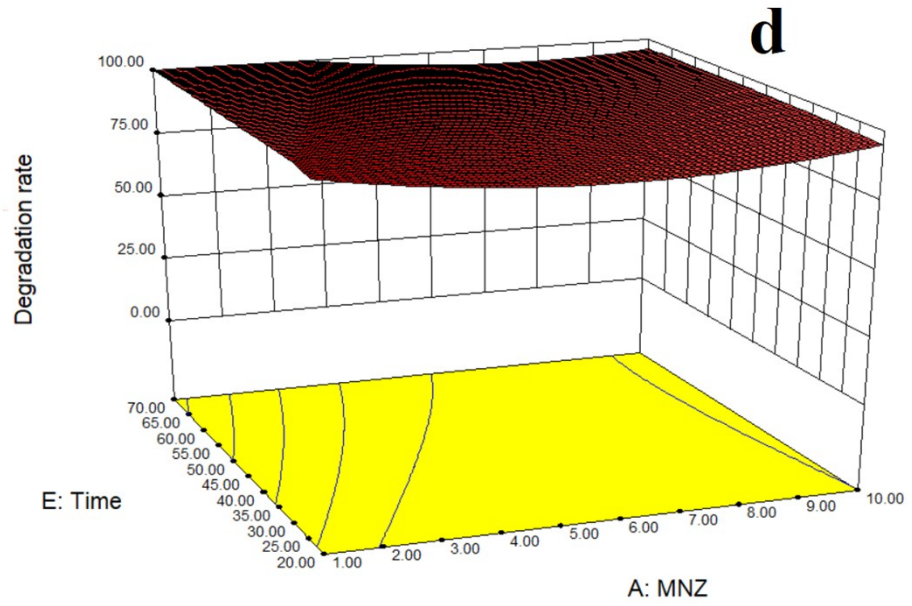

90.56  
 10.18  
 X1 = A: MNZ  
 X2 = F: Fe:Si  
 Actual Factors  
 B: H<sub>2</sub>O<sub>2</sub> = 0.40  
 C: pH = 7.00  
 D: Fe-Si-TiO<sub>2</sub> = 0.30  
 E: Time = 45.00

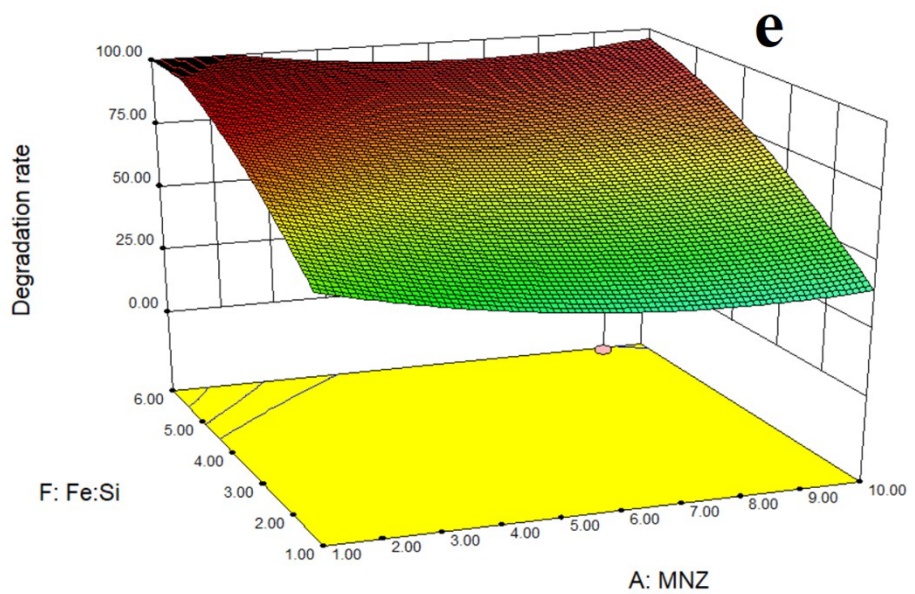

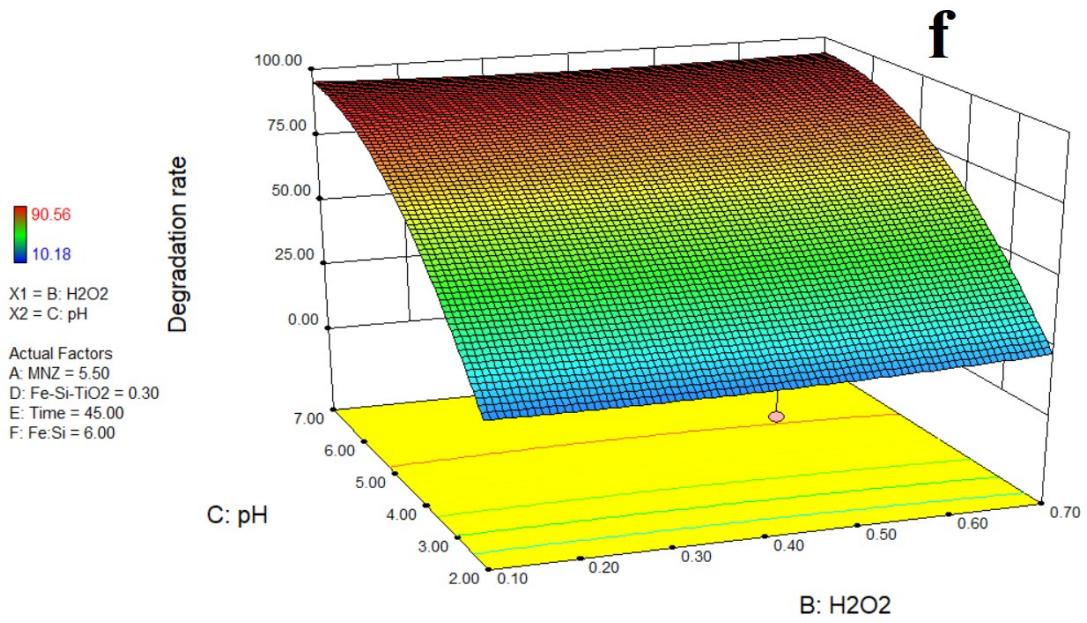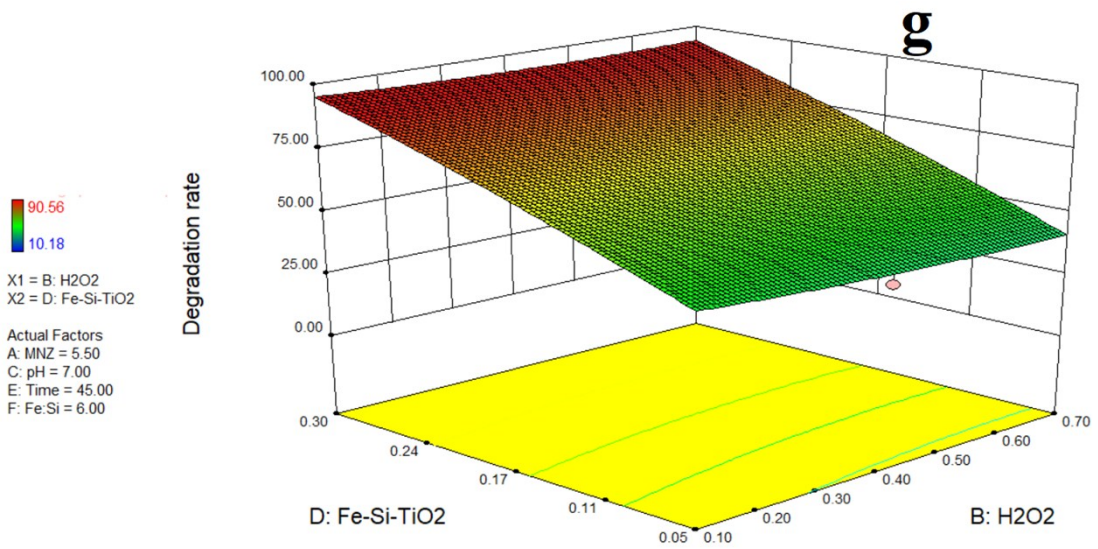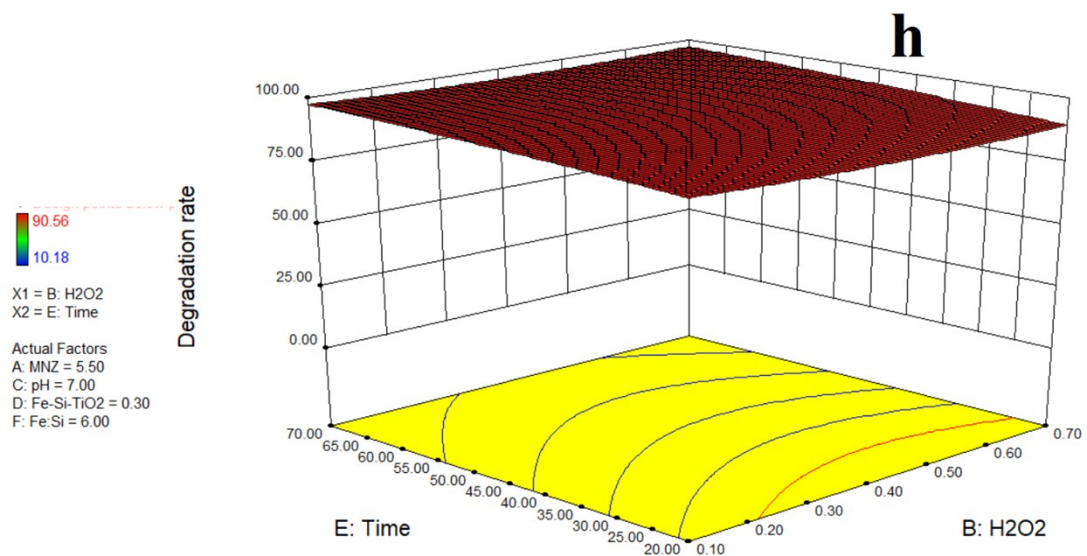

90.56  
 10.18  
 X1 = B: H2O2  
 X2 = F: Fe:Si  
 Actual Factors  
 A: MNZ = 5.50  
 C: pH = 7.00  
 D: Fe-Si-TiO2 = 0.30  
 E: Time = 45.00

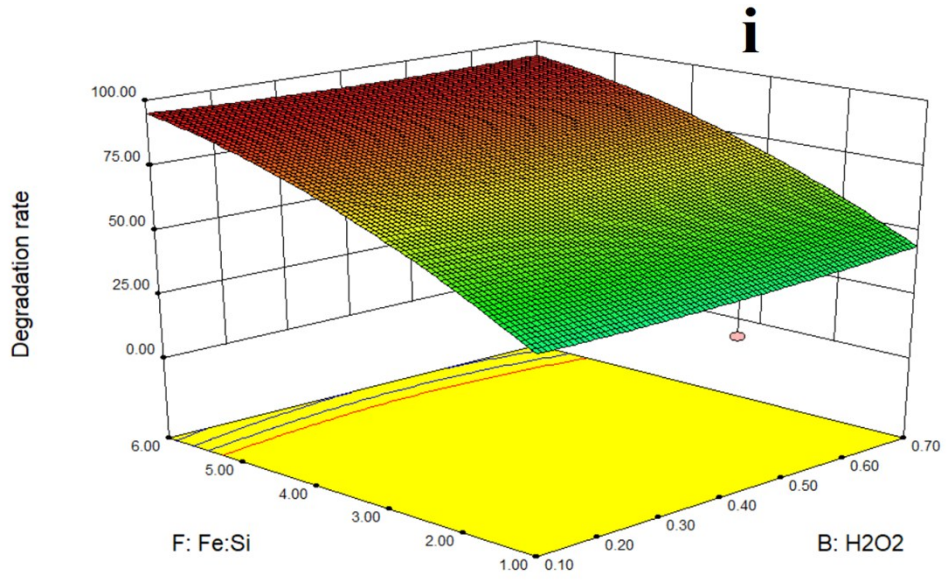

90.56  
 10.18  
 X1 = C: pH  
 X2 = D: Fe-Si-TiO2  
 Actual Factors  
 A: MNZ = 5.50  
 B: H2O2 = 0.40  
 E: Time = 45.00  
 F: Fe:Si = 6.00

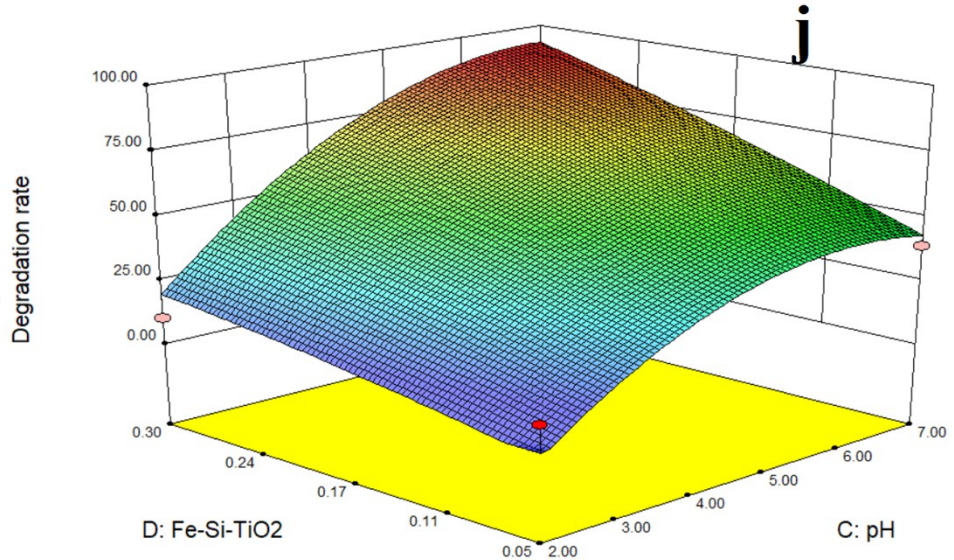

90.56  
 10.18  
 X1 = C: pH  
 X2 = E: Time  
 Actual Factors  
 A: MNZ = 5.50  
 B: H2O2 = 0.40  
 D: Fe-Si-TiO2 = 0.30  
 F: Fe:Si = 6.00

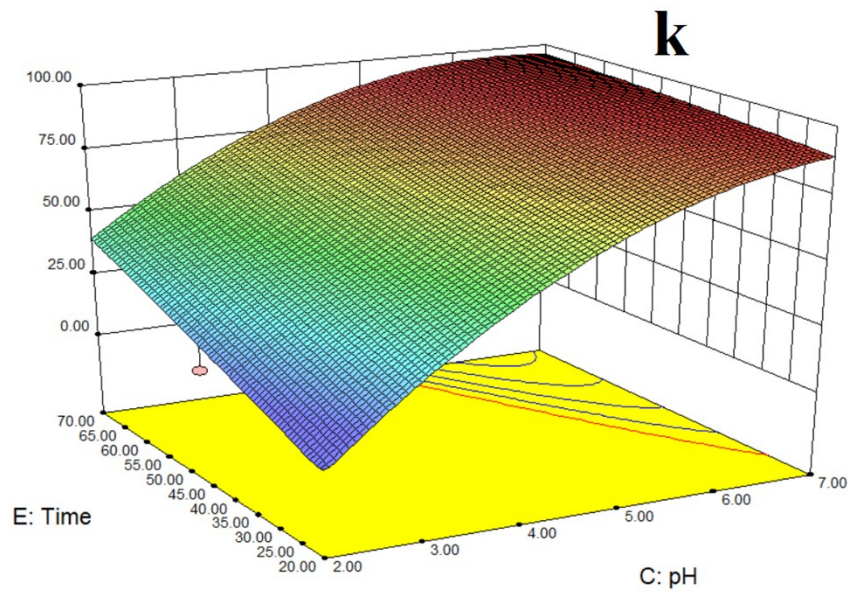

90.56  
10.18

X1 = C: pH  
X2 = F: Fe:Si

Actual Factors  
A: MNZ = 5.50  
B: H2O2 = 0.40  
D: Fe-Si-TiO2 = 0.30  
E: Time = 45.00

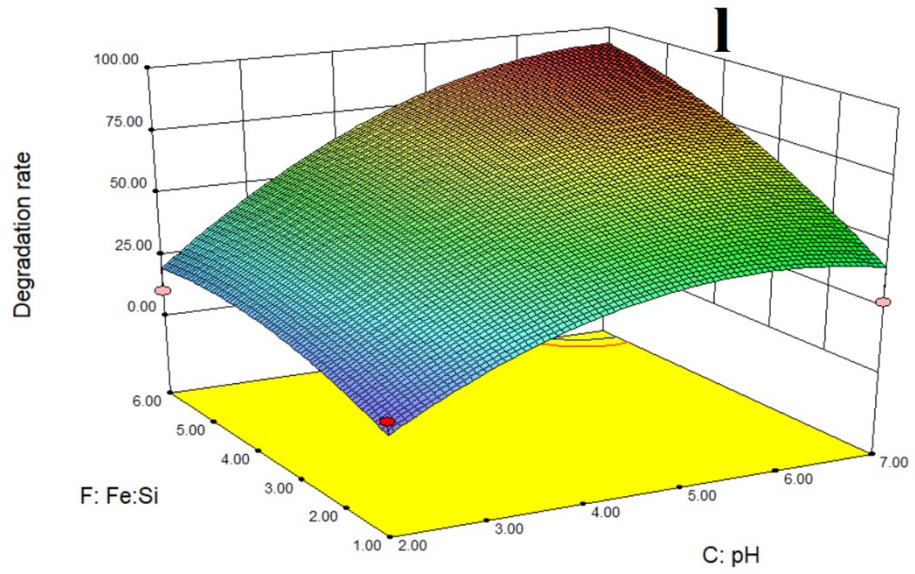

90.56  
10.18

X1 = D: Fe-Si-TiO2  
X2 = E: Time

Actual Factors  
A: MNZ = 5.50  
B: H2O2 = 0.40  
C: pH = 7.00  
F: Fe:Si = 6.00

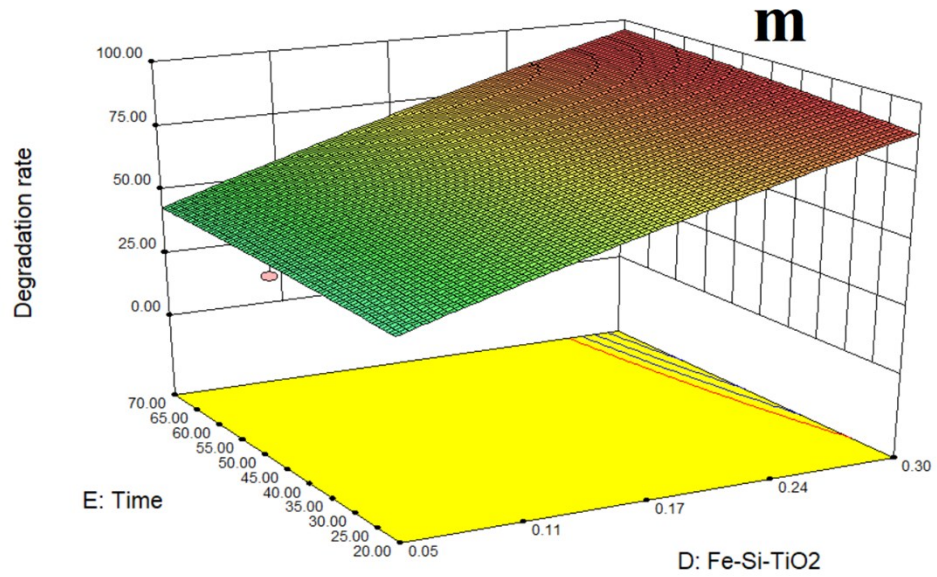

90.56  
10.18

X1 = D: Fe-Si-TiO2  
X2 = F: Fe:Si

Actual Factors  
A: MNZ = 5.50  
B: H2O2 = 0.40  
C: pH = 7.00  
E: Time = 45.00

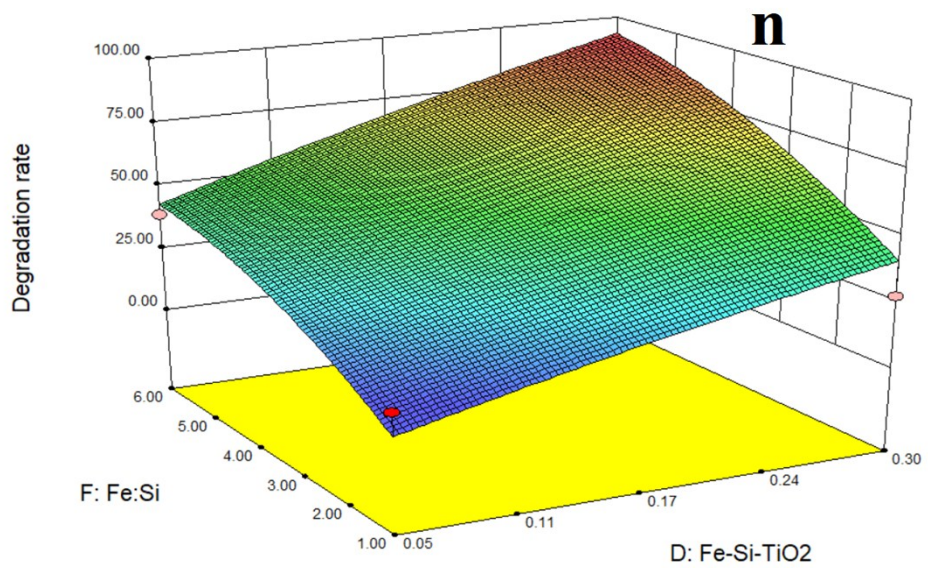

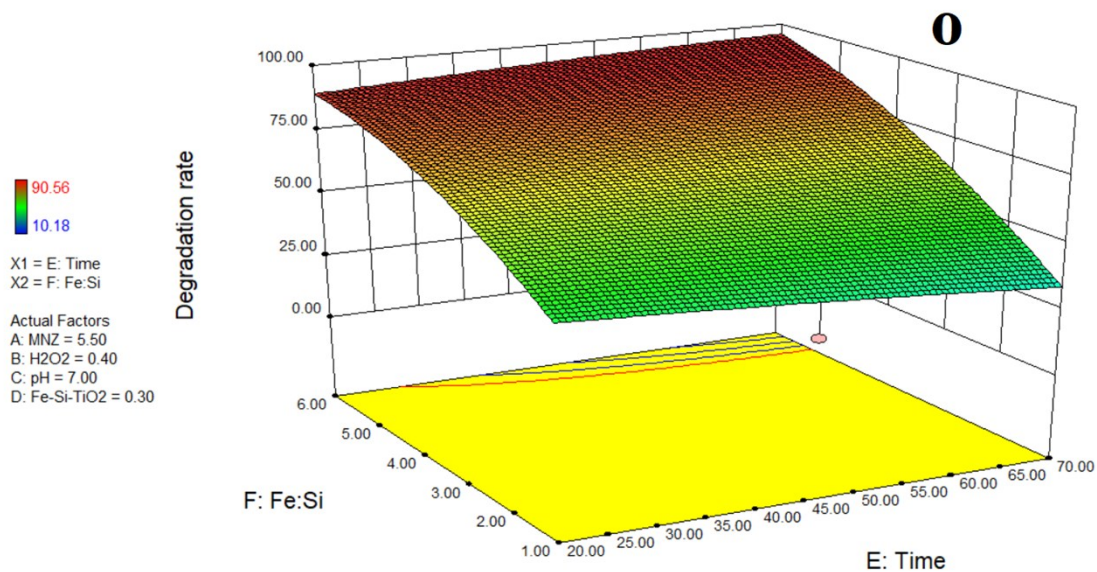

**Fig. S1** Surface plots: concentration of MNZ and dosage of H<sub>2</sub>O<sub>2</sub>(a), concentration of MNZ and pH(b), concentration of MNZ and dosage of catalyst(c), concentration of MNZ and time(d), concentration of MNZ and molar ratio of Fe/Si(e), dosage of H<sub>2</sub>O<sub>2</sub> and pH(f), dosage of H<sub>2</sub>O<sub>2</sub> and dosage of catalyst(g), dosage of H<sub>2</sub>O<sub>2</sub> and time(h), dosage of H<sub>2</sub>O<sub>2</sub> and molar ratio of Fe/Si(i), dosage of catalyst and pH(j), time and pH(k), molar ratio of Fe/Si and pH(l), dosage of catalyst and time(m), dosage of catalyst and molar ratio of Fe/Si(n), time and molar ratio of Fe/Si(o), the ordinate was the MNZ degradation efficiency (%).

The process of Fe/Si codoped TiO<sub>2</sub> for degradation of MNZ contaminated water under visible light illumination in the presence of H<sub>2</sub>O<sub>2</sub> was also optimized using multivariate BBD approach in combination with RSM (Fig. S1 f-i). The degradation rate of MNZ was not increased obviously by increasing of the dosage of H<sub>2</sub>O<sub>2</sub>. For this Photo-Fenton system, H<sub>2</sub>O<sub>2</sub> was more likely to be an inducer, which assisted Fe<sup>3+</sup> to catch e<sup>-</sup> more quickly. According to the optimization by RSM, the most suitable process conditions for the best degradation rate were as follows (the purpose was less time, high degradation efficiency, low cost of consumption), the concentration of MNZ: 6 ppm; the dosage of H<sub>2</sub>O<sub>2</sub>, 0.4 mL/300 mL (10.0 M); pH, 7.0; the dosage of catalysts, 0.3g; the degradation time, 50 min; and the ratio of Fe, Si, 6.0. It was expected to achieve 95% MNZ degraded approximately.

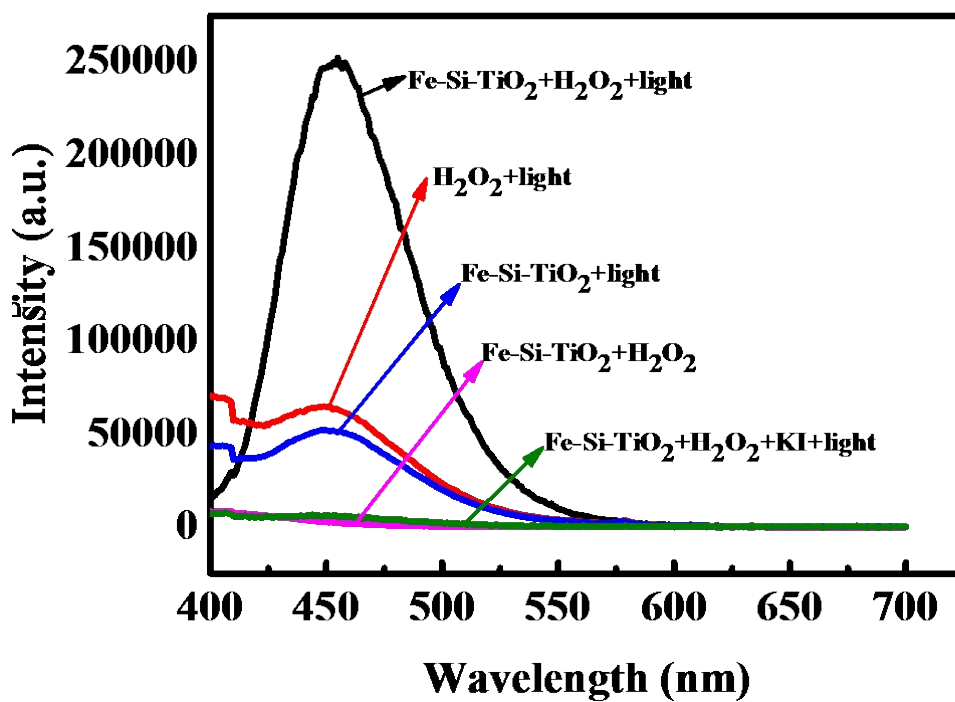

Fig. S2 Luminescence response of trimesic acid reacted with different catalysts under light illumination.

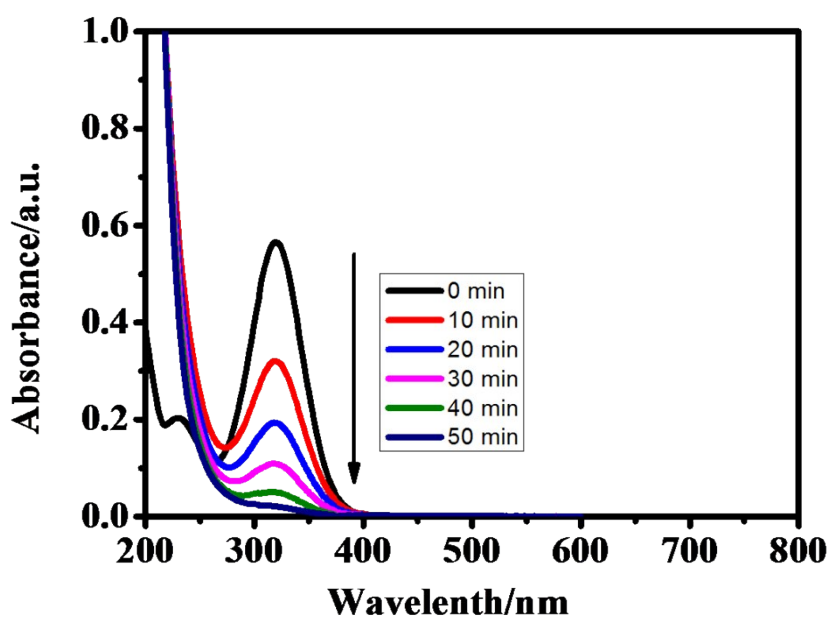

Fig. S3 UV-vis spectra of MNZ during the photo-fenton process.

To further confirm the stability of the Fe/Si codoped, the used catalyst after reaction was examined by HRTEM and XPS, the results are shown in **Fig. S2** and **Fig. S3**. Very tiny differences in the elemental compositions and chemical states of the iron species were observed for the fresh and used Fe/Si codoped TiO<sub>2</sub>. All these results clearly reveal that the catalyst is very stable and can have a good catalytic activity.

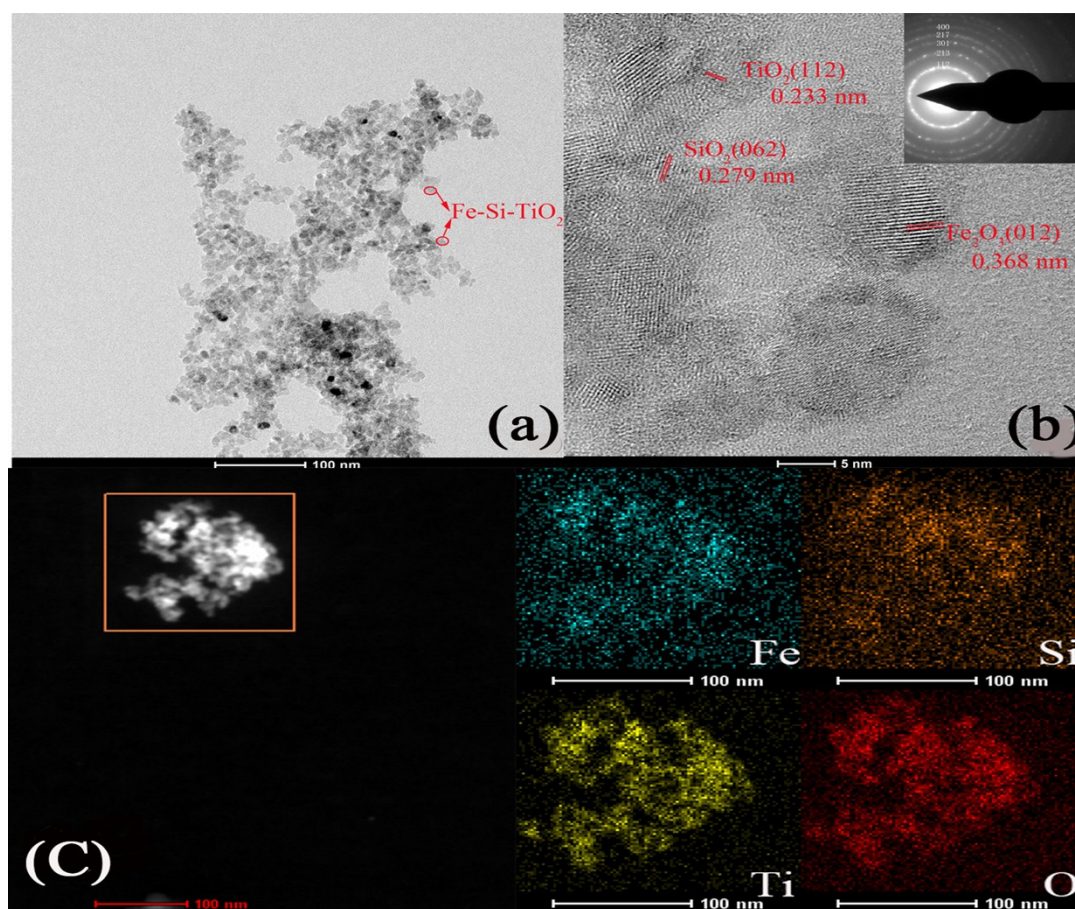

**Fig. S4.** FSTEM images of Fe/Si codoped TiO<sub>2</sub> after degradation, **Fig. S2a** was the image with low magnification figure and **Fig. S2b** was the image with high magnification. **Fig. S2 c:** Element mapping images of Fe/Si codoped TiO<sub>2</sub>.

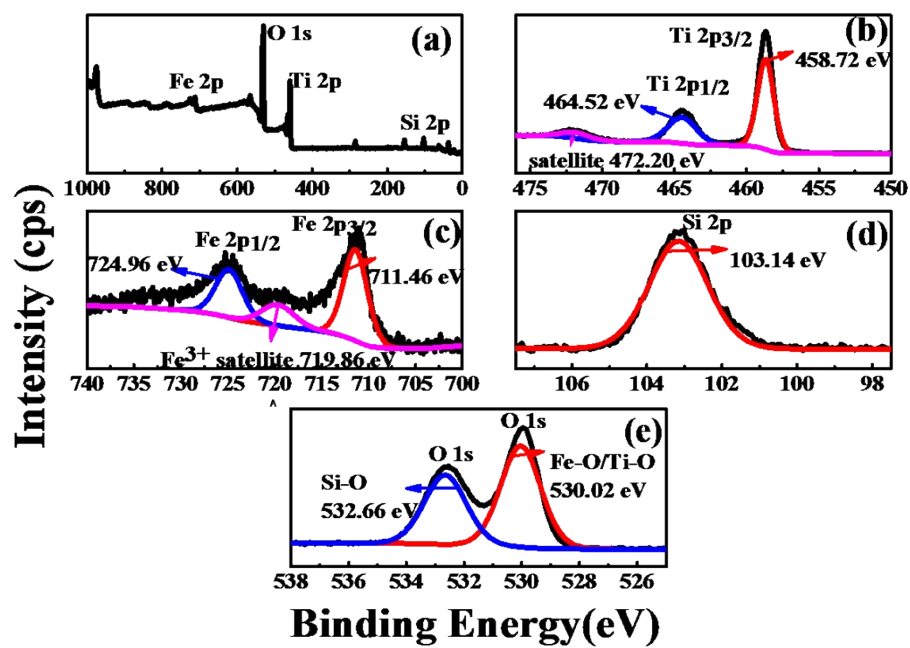

**Fig. S5.** XPS spectra of Fe/Si codoped TiO<sub>2</sub> after Photo-Fenton degradation reaction: (a) survey; (b) Ti 2p peaks; (c) Fe 2p peaks; (d) Si 2p peak; (e) O 1s peaks.



**Table S 4** MNZ degradation efficiency comparison by different catalyst under different conditions for 50 min.

| methods      | catalytic system<br>homogeneous reaction<br>(Fe <sup>3+</sup> +H <sub>2</sub> O <sub>2</sub> ) | TiO <sub>2</sub> | Si doped TiO <sub>2</sub> | Fe doped TiO <sub>2</sub> | Fe/Si codoped TiO <sub>2</sub> without calcination | Fe/Si codoped TiO <sub>2</sub> with calcinations treatment |
|--------------|------------------------------------------------------------------------------------------------|------------------|---------------------------|---------------------------|----------------------------------------------------|------------------------------------------------------------|
| fenton       | \                                                                                              | 1.39%            | 1.41%                     | 1.44%                     | 1.43%                                              | 1.51%                                                      |
| photo        | \                                                                                              | 5.46%            | 6.03%                     | 20.65%                    | 7.47%                                              | 22.26%                                                     |
| Photo-fenton | 5.98%                                                                                          | 5.54%            | 6.33%                     | 79.39%                    | 30.21%                                             | 93.04%                                                     |

**Table S 5** Comparison of MNZ degradation efficiencies by different Fenton, Photo-Fenton or photo systems.

| Catalysts concentration                                   | C <sub>MNZ</sub> (mg/L) | Methods      | Light source  | pH   | t (min) | Efficiency (%) | Active specie                        | K (min <sup>-1</sup> ) | Ref       |
|-----------------------------------------------------------|-------------------------|--------------|---------------|------|---------|----------------|--------------------------------------|------------------------|-----------|
| TiO <sub>2</sub> 1 g/L                                    | 80                      | Photo        | 125W UV lamp  | 7.0  | 120     | 95             | •OH                                  | 0.0233                 | 9         |
| BiVO <sub>4</sub> /FeVO <sub>4</sub> 4 g/L                | 10                      | Photo        | 500 W Xe lamp | 7.0  | 90      | 84             | •O <sub>2</sub> <sup>-</sup>         | \                      | 10        |
| FeS <sub>2</sub> O <sub>8</sub> 3 mM/L                    | 500                     | Fenton       | \             | 3.0  | 180     | 96             | •OH                                  | 0.01                   | 11        |
| BiVO <sub>4</sub> /BiPO <sub>4</sub> 0.5 g/L              | 5                       | Photo        | 300 W UV lamp | 10.0 | 360     | 64.5           | •OH/<br>•O <sub>2</sub> <sup>-</sup> | 0.015                  | 12        |
| Nano ZnO 1.5 g/L                                          | 80                      | Photo        | 180 W UV lamp | 7.0  | 180     | 96.5           | •OH                                  | \                      | 13        |
| Fe-SnO <sub>2</sub> /Co <sub>3</sub> O <sub>4</sub> 2 g/L | 30                      | Photo        | 125 W UV lamp | 6.0  | 15      | 98.3           | \                                    | \                      | 14        |
| Fe/Si codoped TiO <sub>2</sub> 1 g/L                      | 10                      | Photo-Fenton | 220 W Xe lamp | 7.0  | 50      | 93             | •OH                                  | 0.049                  | This work |

## References

1. P. Bansal and A. Verma, *Chemosphere*, 2018, **212**, 611-619.
2. X. Cheng, L. Zu, Y. Jiang, D. Shi, X. Cai, Y. Ni, S. Lin and Y. Qin, *Chem Commun (Camb)*, 2018, **54**, 11622-11625.
3. Q. Sun, Y. Hong, Q. Liu and L. Dong, *Applied Surface Science*, 2018, **430**, 399-406.
4. I. A. Barbosa, L. D. Zanatta, D. M. Espimpolo, D. L. da Silva, L. F. Nascimento, F. B. Zanardi, P. C. de Sousa Filho, O. A. Serra and Y. Yamamoto, *Solid State Sciences*, 2017, **72**, 14-20.
5. Y. Deng, M. Xing and J. Zhang, *Applied Catalysis B: Environmental*, 2017, **211**, 157-166.
6. Y. Hou, Y. Wang, H. Yuan, H. Chen, G. Chen, J. Shen and L. Li, *Journal of Nanoparticle Research*, 2016, **18**.
7. D. Du, W. Shi, L. Wang and J. Zhang, *Applied Catalysis B: Environmental*, 2017, **200**, 484-492.
8. A. I. Khuri and S. Mukhopadhyay, *Wiley Interdisciplinary Reviews: Computational Statistics*, 2010, **2**, 128-149.
9. M. Farzadkia, E. Bazrafshan, A. Esrafil, J. K. Yang and M. Shirzad-Siboni, *Journal Of Environmental Health Science And Engineering*, 2015, **13**.
10. J. Li, W. Zhao, Y. Guo, Z. Wei, M. Han, H. He, S. Yang and C. Sun, *Applied Surface Science*, 2015, **351**, 270-279.
11. H. B. Ammar, *Ultrason Sonochem*, 2016, **33**, 164-169.
12. Y. H. Yan, T. J. Ni, J. G. Du, L. Li, S. Fu, K. Li and J. G. Zhou, *Dalton Transactions*, 2018, **47**, 6089-6101.
13. M. Farzadkia, A. Esrafil, M. A. Baghapour, Y. D. Shahamat and N. Okhovat, *Desalination And Water Treatment*, 2014, **52**, 4947-4952.
14. S. Agarwal, I. Tyagi, V. K. Gupta, M. Sohrabi, S. Mohammadi, A. N. Golikand and A. Fakhri, *Materials Science & Engineering C-Materials for Biological Applications*, 2017, **70**, 178-183.
